# Supplementary material for: CRISPR-based self-cleaving mechanism for controllable gene delivery in human cells
Source: PubMed Central journal article supplement — Nucleic Acids Res. 2014 Dec 18;43(2):1297–303. doi: 10.1093/nar/gku1326 (PMC4333380; doi:10.1093/nar/gku1326), 2014-12-18
Supplement: supp_gku1326_nar-02377-h-2014-File008.pdf [file supp_gku1326_nar-02377-h-2014-File008.pdf]

## **Supplementary Material**

### **CRISPR-based self-cleaving mechanism for controllable gene delivery in human cells**

Richard Moore<sup>1,5</sup>, Alec Spinhirne<sup>1</sup>, Michael J. Lai<sup>2</sup>, Samantha Preisser<sup>3</sup>, Yi Li<sup>1,5</sup>, Taek Kang<sup>1,5</sup>, and Leonidas Bleris<sup>1,4,5</sup>

<sup>1</sup>Bioengineering Department, University of Texas at Dallas, Richardson, Texas, USA

<sup>2</sup>Department of Molecular & Cell Biology, University of Texas at Dallas, Richardson, Texas, USA

<sup>3</sup>Department of Chemistry, University of Texas at Dallas, Richardson, Texas, USA

<sup>4</sup>Electrical Engineering Department, University of Texas at Dallas, Richardson, Texas, USA

<sup>5</sup>Center for Systems Biology, University of Texas at Dallas, Richardson, Texas, USA

Correspondence should be addressed to L.B. ([bleris@utdallas.edu](mailto:bleris@utdallas.edu))

## Supplementary Figures

**Supplementary Figure 1:** Translated open reading frames; cloning steps available in Supplementary Cloning Information.

### Cas9-2A-mKate2-PEST

MDKKYSIGLDIGTNSVGVAVITDEYKVPSSKFKVLGNTDRHSIKKNLIGALLFDSGETAEATRLKRTARRRYTRRKNRICY  
LQEIFSNEMAKVDDSFHRLVESFLVEEDKKHERHPIFGNIVDEVAYHEKYPTIYHLRKKLVDSTDKADLRILIYLAHAMIK  
FRGHFLIEGDLNPDNSDVKLFIQLVQTYNQLFEENPINASGVDAKAILSARLSKSRRENLIQAQLPGEKKNGLFGNLIAS  
LGLTPNFKSNFDLAEDAQLQSKDQYDDDLNLLAQIGDQYADFLAAKNLSDAILSDILRVNTEITKAPLSASMIKRYDE  
HHQDLTLLKALVRQQLPEKYKEIFFDQSKNGYAGYIDGGASQEEFYKFIKPILEKMDGTEELLVKLNREDLLRKQRTFDNG  
SIPHQIHLGELHAILRRQEDFYFPLKDNREKIEKILTRIPYYVGPLARGNSRFAMWTRKSEETITPWNFEVVVDKASQAQ  
SFIERMTNFDKNLPNEKVLPHKSLLEYFTVYNELTKVKYVTEGMRKPAFLSGEQKKAIVDLLFKTNRKVTVKQLKEDYFK  
KIECFDSVEISGVEDRFNASLGTYHDLLKIIKDKDFLDNEENEDILEDIVLTLTFEDREMIEERLKYAHLFDDKVMKQLKR  
RRTYTGWRSLRKLINGIRDQKSGKTILDFLKSDFANRNFQMQLIHDDSLTFKEDIQKAQVSGQGDSLHEHIANLAGSPA  
KKGILQTVKVVDELVKVMGRHKPENIVIEMARENQTTQKGQKNSRERMKRIEELGKELGSQILKEHPVENTQLQNEKLY  
LYLQNGRDMYVDQELINRLSDYDHDHIVPQSFLKDDSIDNKVLRSDKNRGSNDNVPSEEVVKKMKNYWRQLLNA  
KLITQRKFDNLTKAERGGSELKAGFIKRLVETRQITKHVAQILDSRMNTKYDENDKLIREVKVITLKSCLVSDFRKDFQ  
FYKVRINNYHHAHDAYLNAVVGTAIKKYPKLESEFVYGDYKVVYDVRKMIKSEQEIQKATAKYFFYSNIMNFFKTEITL  
ANGEIRKRPLIETNGETGEIVWDKGRDFATVRKVLSPQVNIKKTEVQTGGFSKESILPKRNSDKLIARKKDWDPKKY  
GGFDSPTVAYSVLVAKVEKGSKLLKSVKELLGITIMERSSEFEKNPIDFLEAKGYKEVKKDLIIPKYSLFELENGRKRML  
ASAGELQKGNELALPSKYVNFYLAHYEKLKGSPEDEQKQLFVEQHKHYLDEIIEQISEFSKRIVLADANLDKVLAYSAN  
HRDKPIREQAENIHLFTLNLGAPAAFKYDITDRKRYTSTKEVLDATLIHQISITGLYETRIDLSQLGGDSRADPKKRV  
**AEGRGSLLTCGDVEENPGPSGGPMVSELIKENMHMCLYMEGTVNNHFKCTSEGEKPYEGTQTMRIKAVEGGPLPF**  
**AFDILATSFMYGSKTFINHTQGIPDFFKQSFPEGFTWERVTTYEDGGVLTATQDTSLQDGLIYNVKIRGVNFPNGPV**  
**MQKKTGWEEASTETLYPADGGLEGRADMALKLVGGGLICNLKTTYRSKPKAKNLKMPGVYVDRRLRIKEADKETY**  
**VEQHEVAVARYCDLPSKLGHRGGGSGSHGFPEVEEQAAGTLPMSCAQESGMDRHPAACASARINV**

### Cas9-2A-mKate2

MDKKYSIGLDIGTNSVGVAVITDEYKVPSSKFKVLGNTDRHSIKKNLIGALLFDSGETAEATRLKRTARRRYTRRKNRICY  
LQEIFSNEMAKVDDSFHRLVESFLVEEDKKHERHPIFGNIVDEVAYHEKYPTIYHLRKKLVDSTDKADLRILIYLAHAMIK  
FRGHFLIEGDLNPDNSDVKLFIQLVQTYNQLFEENPINASGVDAKAILSARLSKSRRENLIQAQLPGEKKNGLFGNLIAS  
LGLTPNFKSNFDLAEDAQLQSKDQYDDDLNLLAQIGDQYADFLAAKNLSDAILSDILRVNTEITKAPLSASMIKRYDE  
HHQDLTLLKALVRQQLPEKYKEIFFDQSKNGYAGYIDGGASQEEFYKFIKPILEKMDGTEELLVKLNREDLLRKQRTFDNG  
SIPHQIHLGELHAILRRQEDFYFPLKDNREKIEKILTRIPYYVGPLARGNSRFAMWTRKSEETITPWNFEVVVDKASQAQ  
SFIERMTNFDKNLPNEKVLPHKSLLEYFTVYNELTKVKYVTEGMRKPAFLSGEQKKAIVDLLFKTNRKVTVKQLKEDYFK  
KIECFDSVEISGVEDRFNASLGTYHDLLKIIKDKDFLDNEENEDILEDIVLTLTFEDREMIEERLKYAHLFDDKVMKQLKR  
RRTYTGWRSLRKLINGIRDQKSGKTILDFLKSDFANRNFQMQLIHDDSLTFKEDIQKAQVSGQGDSLHEHIANLAGSPA  
KKGILQTVKVVDELVKVMGRHKPENIVIEMARENQTTQKGQKNSRERMKRIEELGKELGSQILKEHPVENTQLQNEKLY  
LYLQNGRDMYVDQELINRLSDYDHDHIVPQSFLKDDSIDNKVLRSDKNRGSNDNVPSEEVVKKMKNYWRQLLNA  
KLITQRKFDNLTKAERGGSELKAGFIKRLVETRQITKHVAQILDSRMNTKYDENDKLIREVKVITLKSCLVSDFRKDFQ  
FYKVRINNYHHAHDAYLNAVVGTAIKKYPKLESEFVYGDYKVVYDVRKMIKSEQEIQKATAKYFFYSNIMNFFKTEITL  
ANGEIRKRPLIETNGETGEIVWDKGRDFATVRKVLSPQVNIKKTEVQTGGFSKESILPKRNSDKLIARKKDWDPKKY  
GGFDSPTVAYSVLVAKVEKGSKLLKSVKELLGITIMERSSEFEKNPIDFLEAKGYKEVKKDLIIPKYSLFELENGRKRML  
ASAGELQKGNELALPSKYVNFYLAHYEKLKGSPEDEQKQLFVEQHKHYLDEIIEQISEFSKRIVLADANLDKVLAYSAN  
Continues on following page

HRDKPIREQAENIIHLFTLTNLGAPAAAFKYFDTTIDRKRYTSTKEVLDATLIHQSI TGLYETRIDLSQLGGDSRADPKKKRKV  
AEGRGSLLTCGDVEENPGPSGGPMVSELIKENMHMKLYMEGTVNNHHFKCTSEGE GPKPYEGTQTMRIKAVEGGPLPF  
AFDILATSFMYGSKTFINHTQGIPDFFKQSFPEGFTWERVTTYEDGGVLTATQDTS LQDGLIYNVKIRGVNFPNSGPV  
MQKKT LGWEASTETLYPADGGLEGRADMALKLVGGGHLICNLKTTYRSKKPAKNLKM PGGVYVDRRLRIKEADKETY  
VEQHEVA VARYCDLPSKLGHR

Cas9-2A-ORF#1-TagCFP-PEST

MDKKYSIGLDIGTNSVGWAVITDEYKVP SKKFKVLGNTDRHSIKKNLIGALLFDSGETAEATRLKRTARRRYTRRKNRICY  
LQEIFSNEMAKVDDSFHRL EESFLVEEDKKHERHPIFGNIVDEVAYHEKYPTIYHLRKKLVDSTDKADLR LIYLALAHMIK  
FRGHFLIEGDLNPDNSDVKLFIQLVQTYNQLFEENPINASGVDAKAILSARLSKSRLENLIAQLPGEKKNGLFGNLIAS  
LGLTPNFKSNFDLAEDAKLQLSKDYDDDLNLLAQIGDQYADFLAAKNLSDAILSDILRVNTEITKAPLSASMIKRYDE  
HHQDLTLLKALVRQQLPEKYKEIFFDQSKNGYAGYIDGGASQEEFYKFIKPILEKMDGTEELLVKNREDLLRKQRTFDNG  
SIPHQIHLGELHAILRRQEDFYFPLKDNREKIEKILTRIPYYVGPLARGNSRFAWMTRKSEETITPWNFEEVVDKGASAQ  
SFIERMTNFDKNLPNEKVLPKHSLLYEYFTVYNELTKVKYVTEGMRKPAFLSGEQKKAIVDLLFKTNRKVTVKQLKEDYFK  
KIECFDSVEISGVEDRFNASLGT YHDLKIIKDKDFLDNEENEDILEDIVLTLTFEDREMIEERLKTYAHLFDDKVMKQLKR  
RRYTGWGRLSRKLINGIRDKQSGKTILDFLKSDFANRNFMQLIHDDSLTFKEDIQKAQVSGQGD SLHEHIANLAGSPA I  
KKGILQTVKVVDELVKVMGRHKPENIVIEMARENQTTQKGQKNSRERMKRIE EGKELGSQILKEHPVENTQLQNEKLY  
LYLQNGRDMYVDQELDINRLSDYDVDHIVPQSFLKDDSIDNKVLRSDKNRGKSDNVPSEEVVKKMKNYWRQLLNA  
KLITQRKFDNLTKAERGGSELDKAGFIKRQLVETRQJTKHVAQILDSRMNTKYDENDKLIREVKVITLKS KLVSDFRKDFQ  
FYKVIENNYHHAHDAYLNAVVG TALIKKYPKLESEFVYGDYKVYDVRKMIKSEQEIGKATAKYFFYSNIMNFFKTEITL  
ANGEIRKRPLIETNGETGEIVWDKGRDFATVRKVL SMPQVNIVKKTEVQTGGFSKESILPKRNSDKLIARKKDWDPK KY  
GGFDSPTVAYSVLVAKVEKGSKKLKSVKELLGITIMERS SFEKNPIDFLEAKGYKEVKKDLI IKLPKYSLFELENGRKRML  
ASAGELQKGNELALPSKYVNFY LASHYEKLGSPEDNEQKQLFVEQHKHYLDEIIEQISEFSKR VILADANLDKVL SAYNK  
HRDKPIREQAENIIHLFTLTNLGAPAAAFKYFDTTIDRKRYTSTKEVLDATLIHQSI TGLYETRIDLSQLGGDSRADPKKKRKV  
AEGRGSLLTCGDVEENPGPMRIKAVEGMSGGEELFAGIVPVLIELDGDVHGHKFSVRGEGEGDADY GKLEIKFICTTGKL  
PVPWP TLVTTLAWGIQCFARYPEHMKMNDFFKSAMPEGYIQERTIHFQDDGKYKTRGEVKFEGDTLVNRVELKGEGF  
KEDGNILGHKLEYS AISDNVYIMPDKANNGLEANFKIRHNIEGGGVQLADHYQTNVPLGDGPVLIPINHYLSCQSAISKD  
RNEARDH MVLLESFSAYCHTHGMDELYR SGLRSSHGFPPEVEEQAAGTLPMSCAQESGMDRHPAACASARIN V

TagCFP-PEST

MSGGEELFAGIVPVLIELDGDVHGHKFSVRGEGEGDADY GKLEIKFICTTGKLPVPWP TLVTTLAWGIQCFARYPEHMK  
MNDFFKSAMPEGYIQERTIHFQDDGKYKTRGEVKFEGDTLVNRVELKGEGFKEDGNILGHKLEYS AISDNVYIMPDKAN  
NGLEANFKIRHNIEGGGVQLADHYQTNVPLGDGPVLIPINHYLSCQSAISKDRNEARDH MVLLESFSAYCHTHGMDELY  
RSGLRSSHGFPPEVEEQAAGTLPMSCAQESGMDRHPAACASARIN V

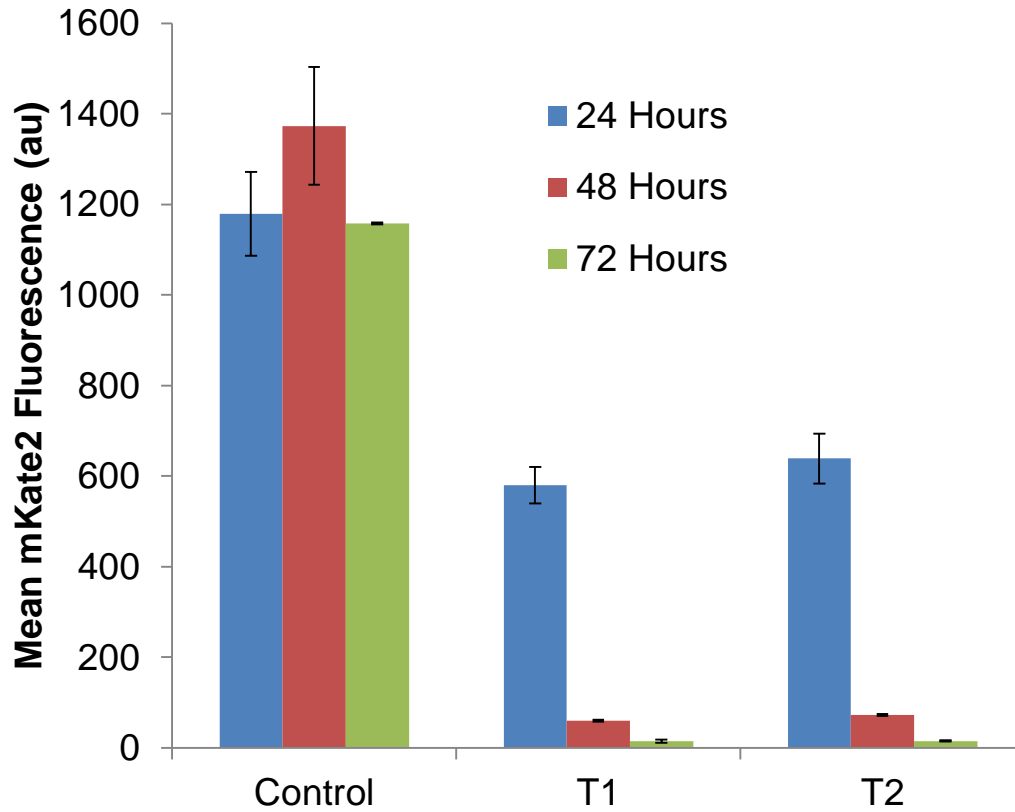

**Supplementary Figure 2:** Triplicate flow cytometry time lapse of 100ng of each plasmid transiently transfected in HEK-293 cells. Control contains the non-targeting gRNA (pCas9-mKate2ps-CgRNA) while T1 (pCas9-mKate2ps-T1gRNA) and T2 (pCas9-mKate2ps-T2gRNA) contain the gRNAs targeting the mKate2 ORF. Error bars show standard deviation of the calculated means from three biological replicates.

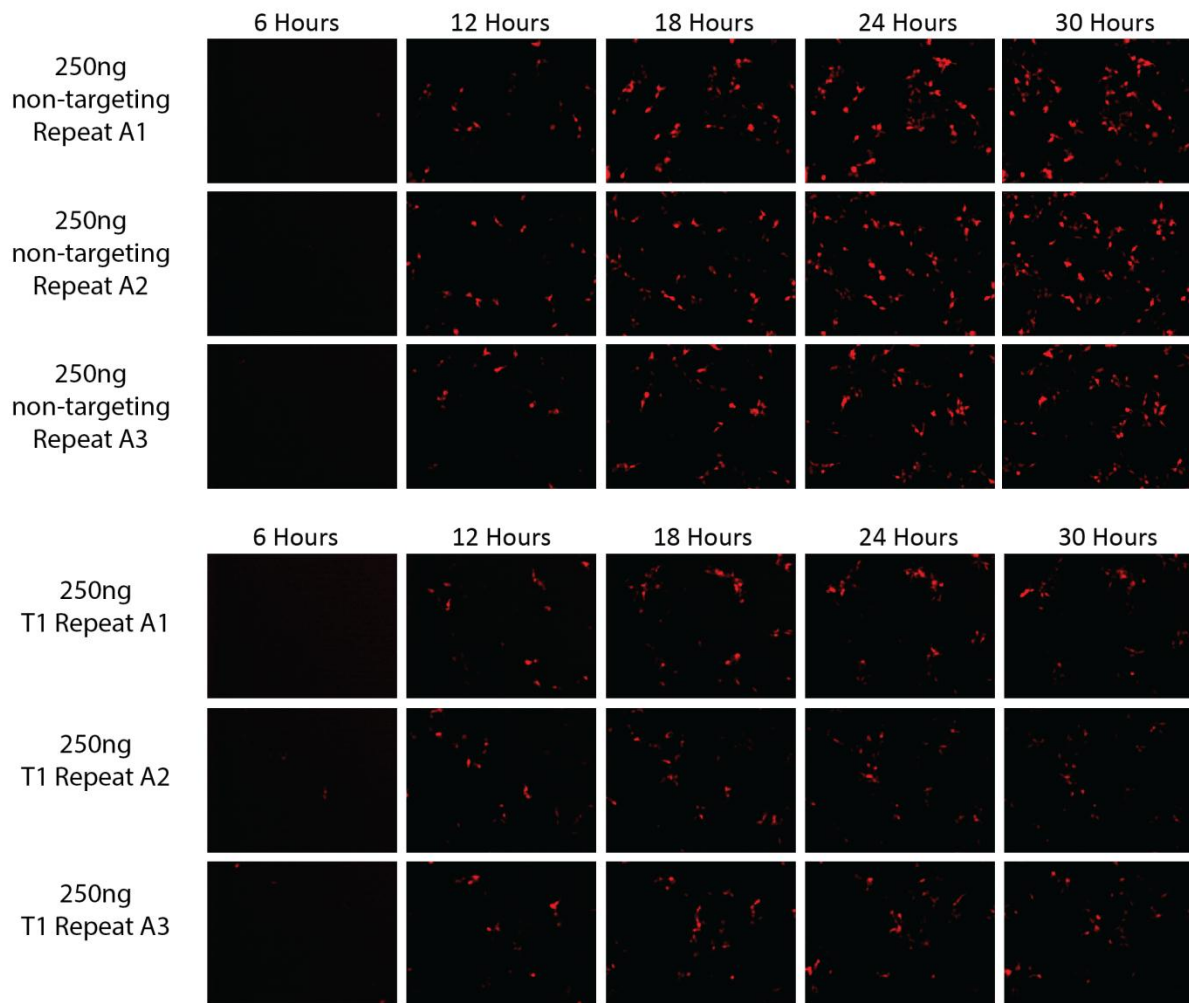

**Supplementary Figure 3:** 6-30 hour time-lapse microscopy measurements of mKate2 reporter expression for pCas9-mKate2ps-T1gRNA and the non-targeting pCas9-mKate2ps-CgRNA. The repeats correspond to different positions in the same well (technical replicates T1gRNA: A1, A2, A3 and non-targeting CgRNA: A1, A2, A3) from two wells transiently transfected with 250ng of the plasmids. The time-lapse protocol is available in Microscopy Methods.

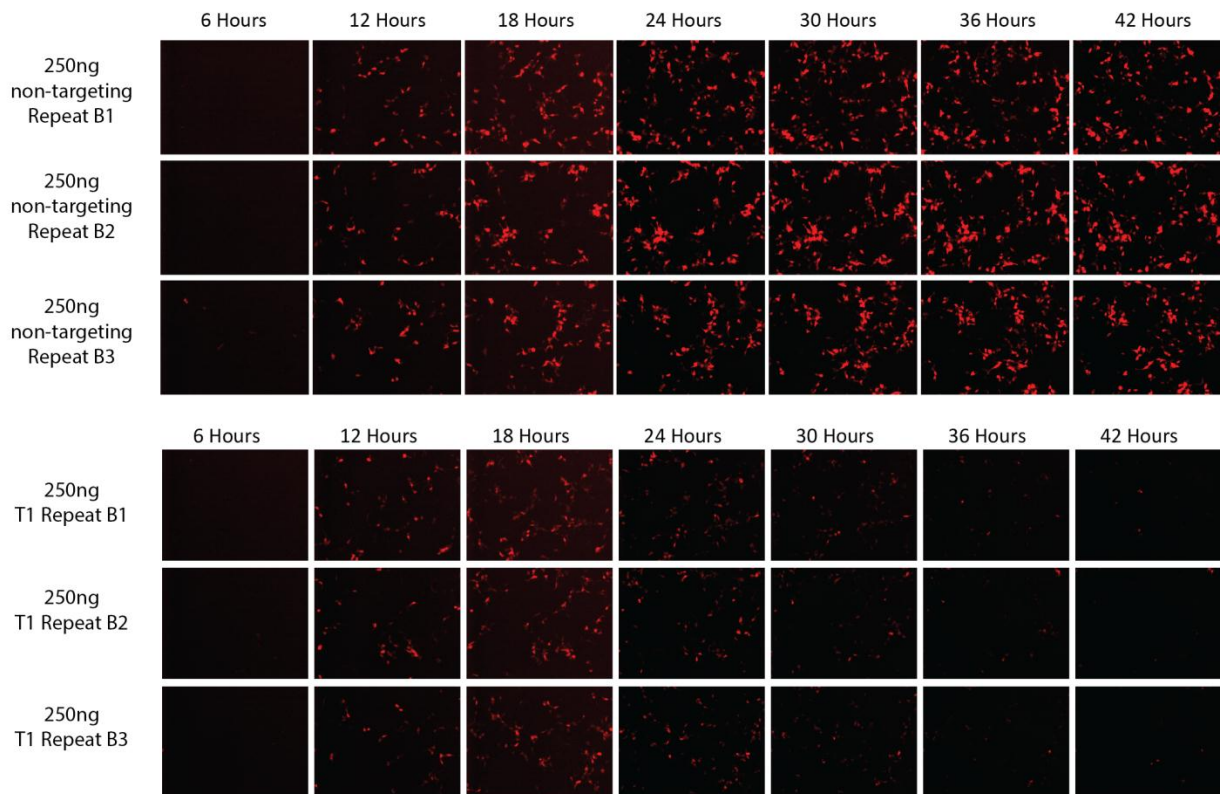

**Supplementary Figure 4:** 6-42 hour microscopy time-lapse measurements of mKate2 reporter expression for pCas9-mKate2ps-T1gRNA and the non-targeting pCas9-mKate2ps-CgRNA. The time-lapse protocol is available in Microscopy Methods. The repeats correspond to different positions in the same well (technical replicates T1gRNA: B1, B2, B3 and non-targeting CgRNA: B1, B2, B3) from two wells transiently transfected with 250ng of the plasmids.

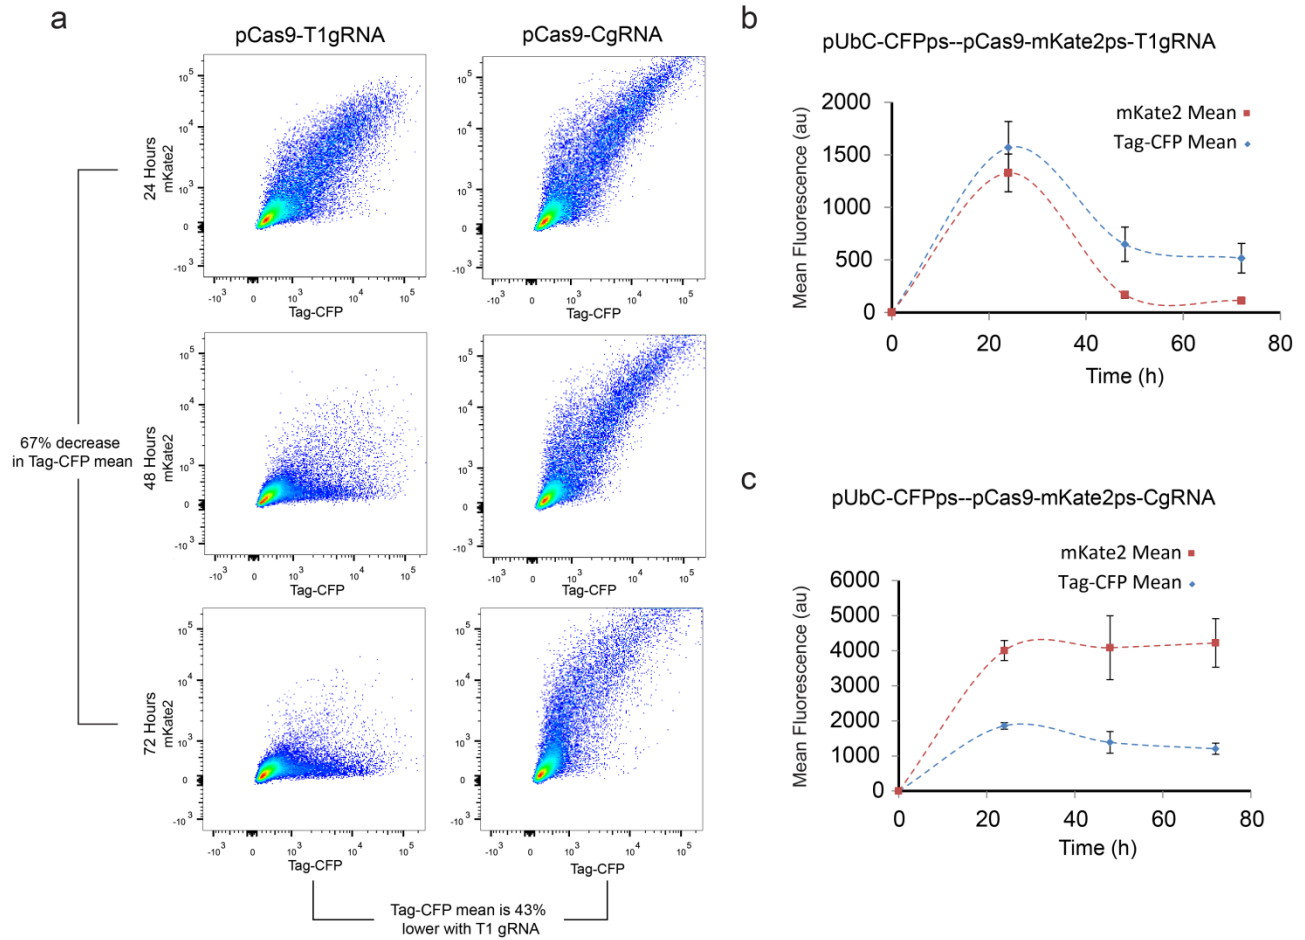

**Supplementary Figure 5:** (a) Flow cytometry scatter plot data of the T1gRNA two reporter system (pUbC-CFPps--pCas9-mKate2ps-T1gRNA) transiently transfected at 100ng versus the non-targeting two reporter system (pUbC-CFPps--pCas9-mKate2ps-CgRNA). Mean Tag-CFP with the T1gRNA decreases by 67% from 24 to 72 hours as calculated from triplicate biological replicates (1567 AU to 516 AU, SD +/- 250 and 141 respectively). (b) The T1gRNA two reporter system (pUbC-CFPps--pCas9-mKate2ps-T1gRNA). Error bars show standard deviation of the calculated means from three biological replicates. (c) Non-targeting two reporter system (pUbC-CFPps--pCas9-mKate2ps-CgRNA). Error bars show standard deviation of the calculated means from three biological replicates.

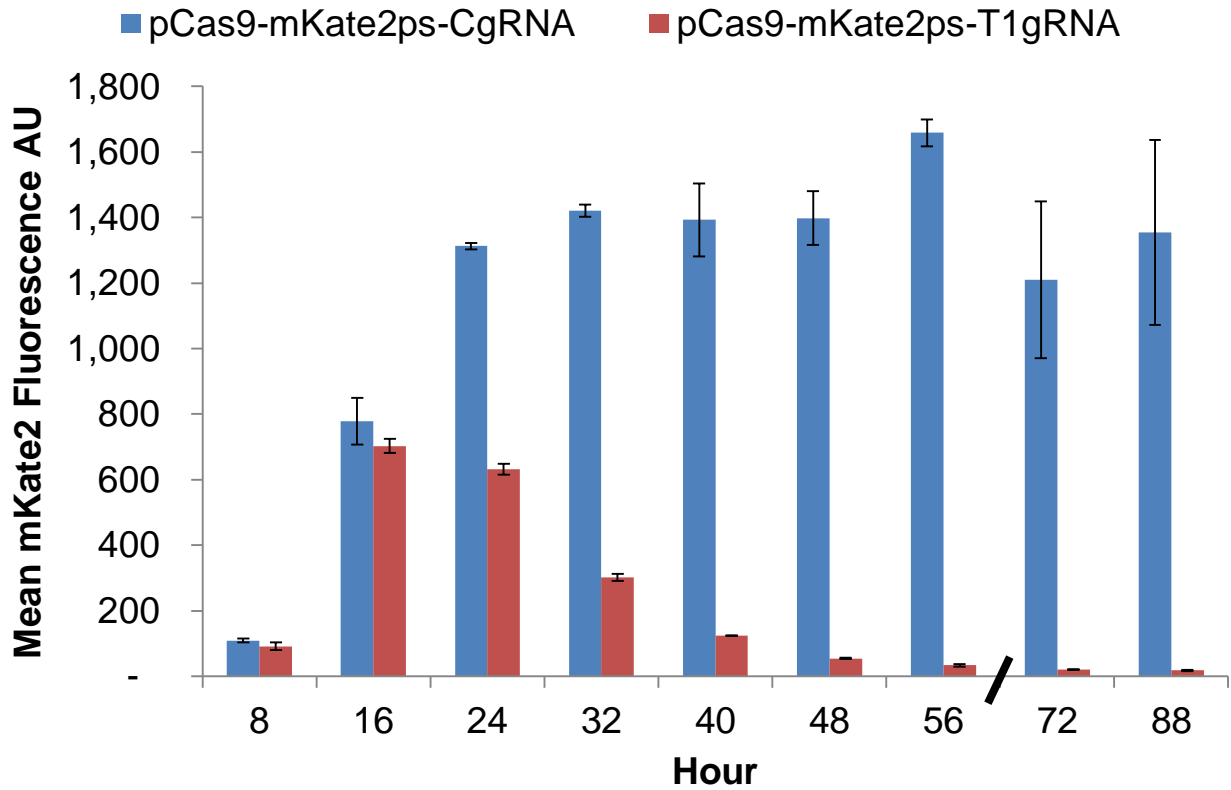

**Supplementary Figure 6:** Triplicate flow cytometry time lapse of 100ng of each plasmid transiently transfected. The plasmid pCas9-mKate2ps-CgRNA contains the non-targeting gRNA while pCas9-mKate2ps-T1gRNA has a gRNA targeting the mKate2 ORF. Error bars represent standard deviation of the means.

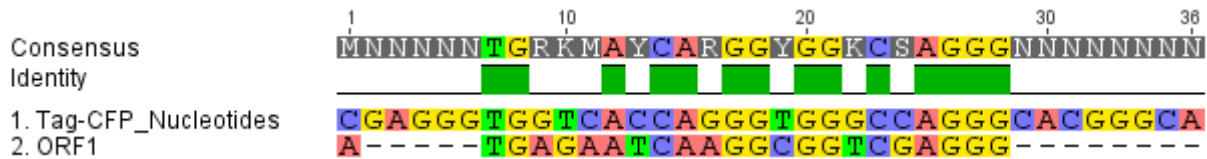

**Supplementary Figure 7:** Nucleotides 166 to 182 of the ORF of Tag-CFP are shown. Alignment with the T1 gRNA indicates a protospacer with 9 mismatches.



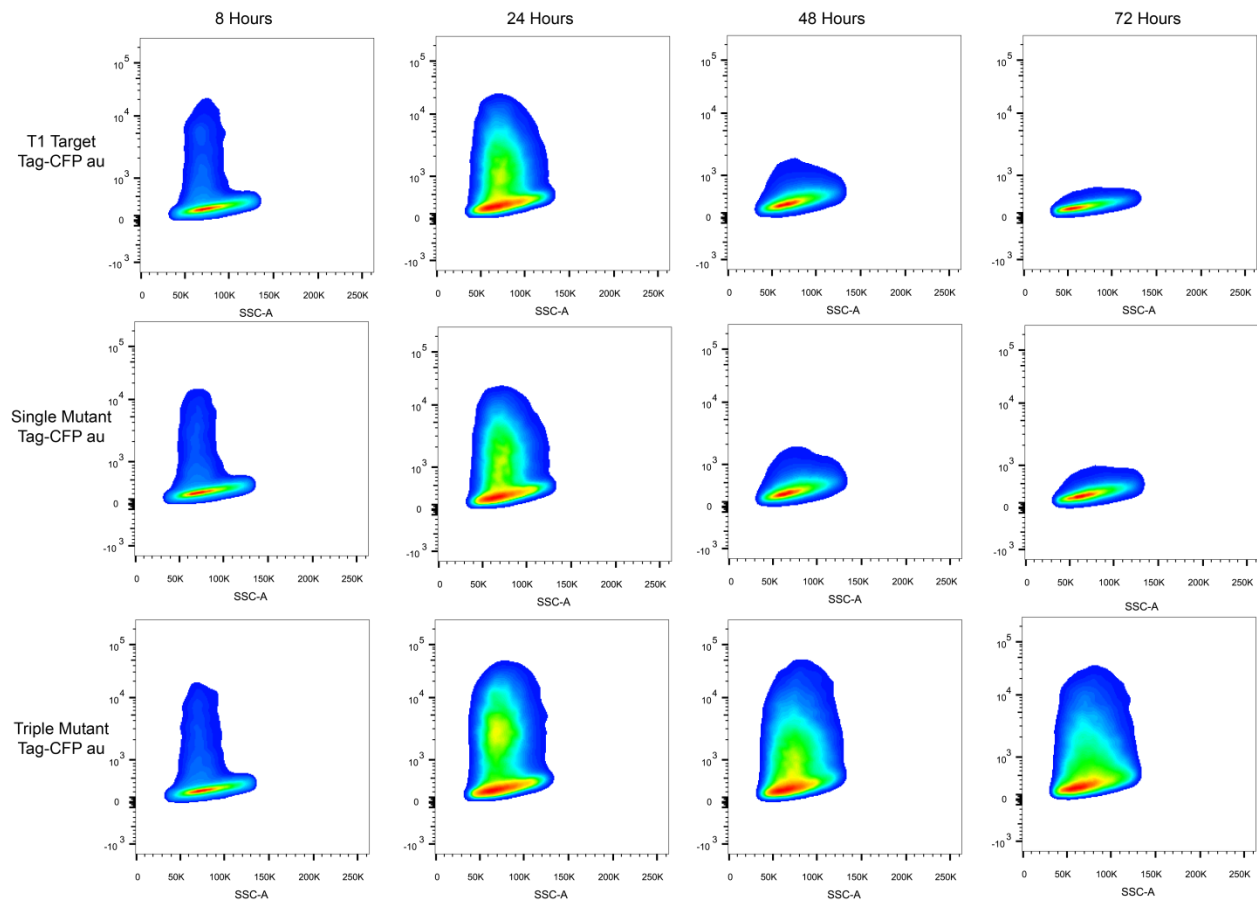

**Supplementary Figure 8:** Representative flow cytometry analysis showing Tag-CFP au intensity versus SSC for the original T1 target (pCas9-t1-CFPps-T1gRNA), the single mutant (pCas9-mut1-CFPps-T1gRNA) and triple mutant (pCas9-mut3-CFPps-T1gRNA).

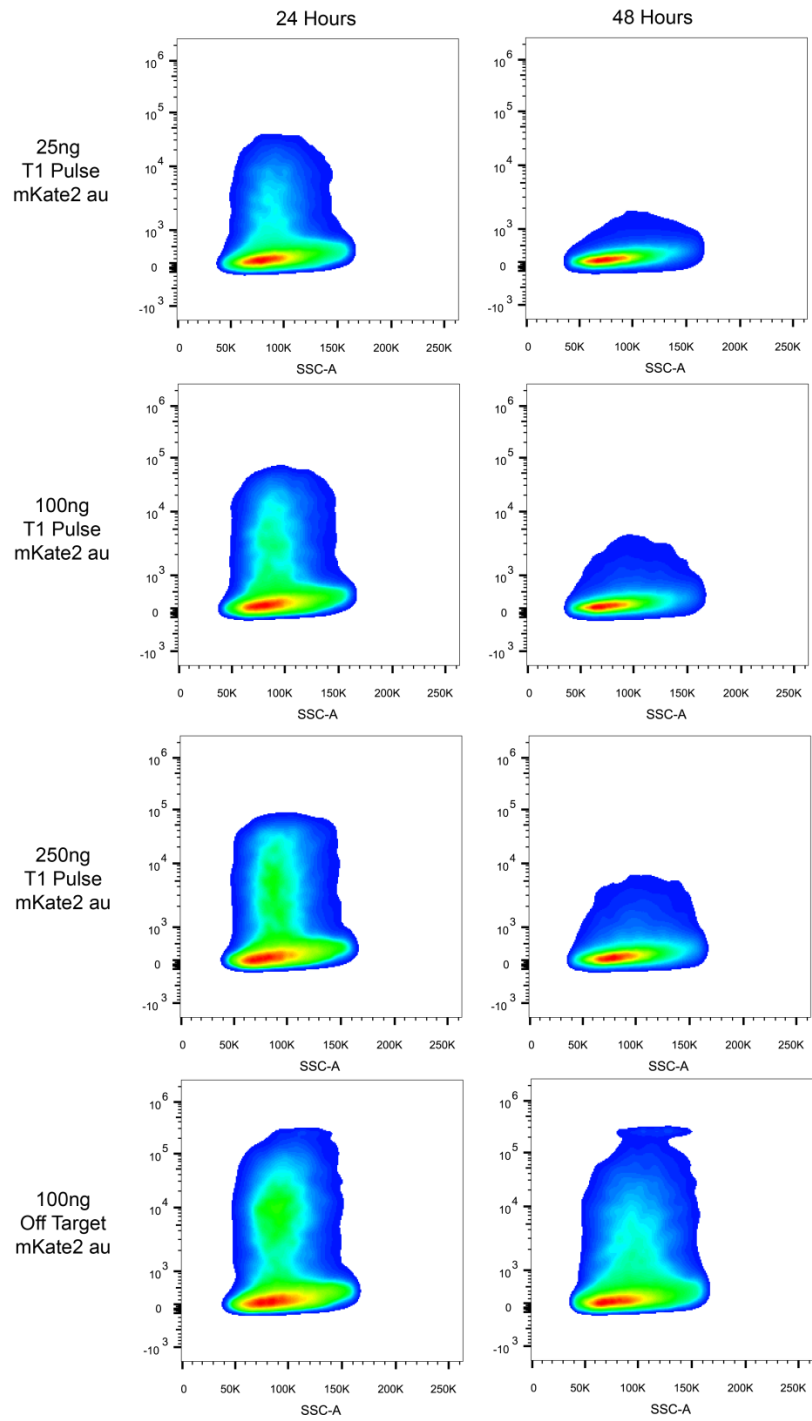

**Supplementary Figure 9:** Representative flow cytometry analysis showing mKate2 versus SSC for the titrations of 25ng, 100ng and 250ng of pCas9-mKate2ps-T1gRNA. Positive control is 100ng of the single plasmid with the non-targeting CgRNA (pCas9-mKate2ps-CgRNA).

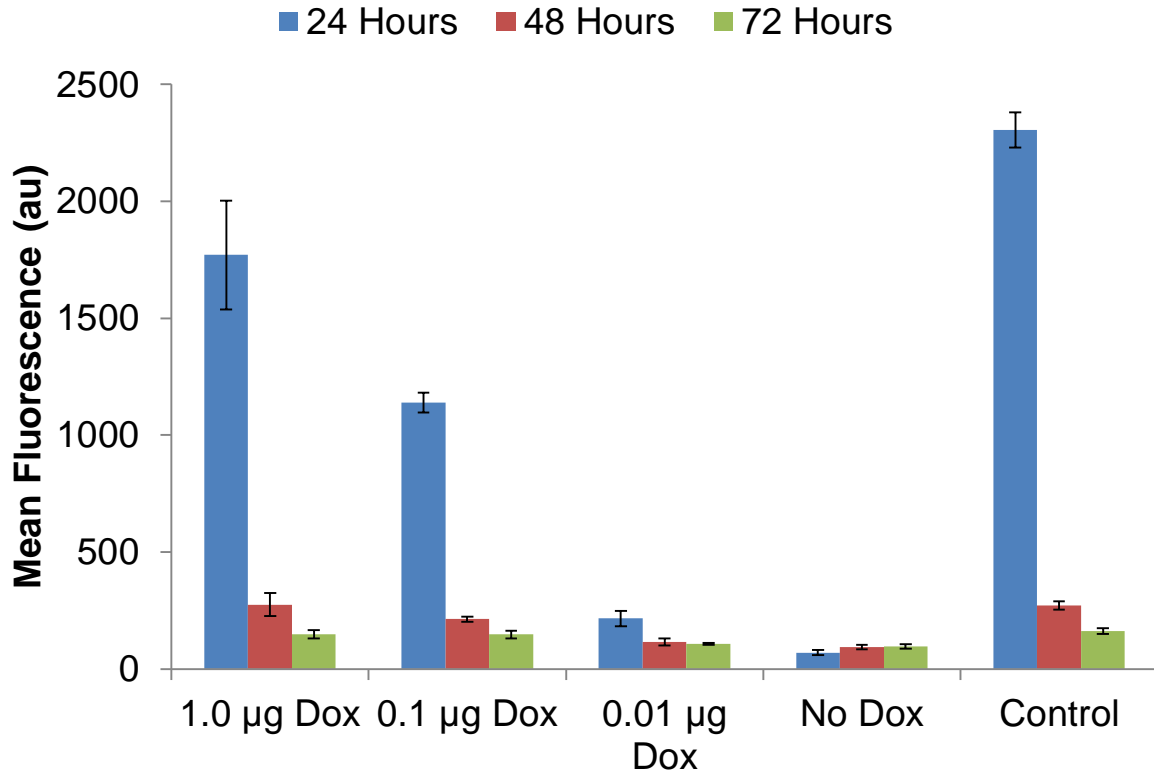

**Supplementary Figure 10:** Triplicates of 100ng of each plasmid transiently transfected. Control is pCas9-mKate2ps-T1gRNA plasmid with Cas9 under control of CMV. For the Dox experiments the Cas9 is under TRE promoter control (ptreCas9-mKate2-T1gRNA). Error bars show standard deviation of the calculated means from three replicates.

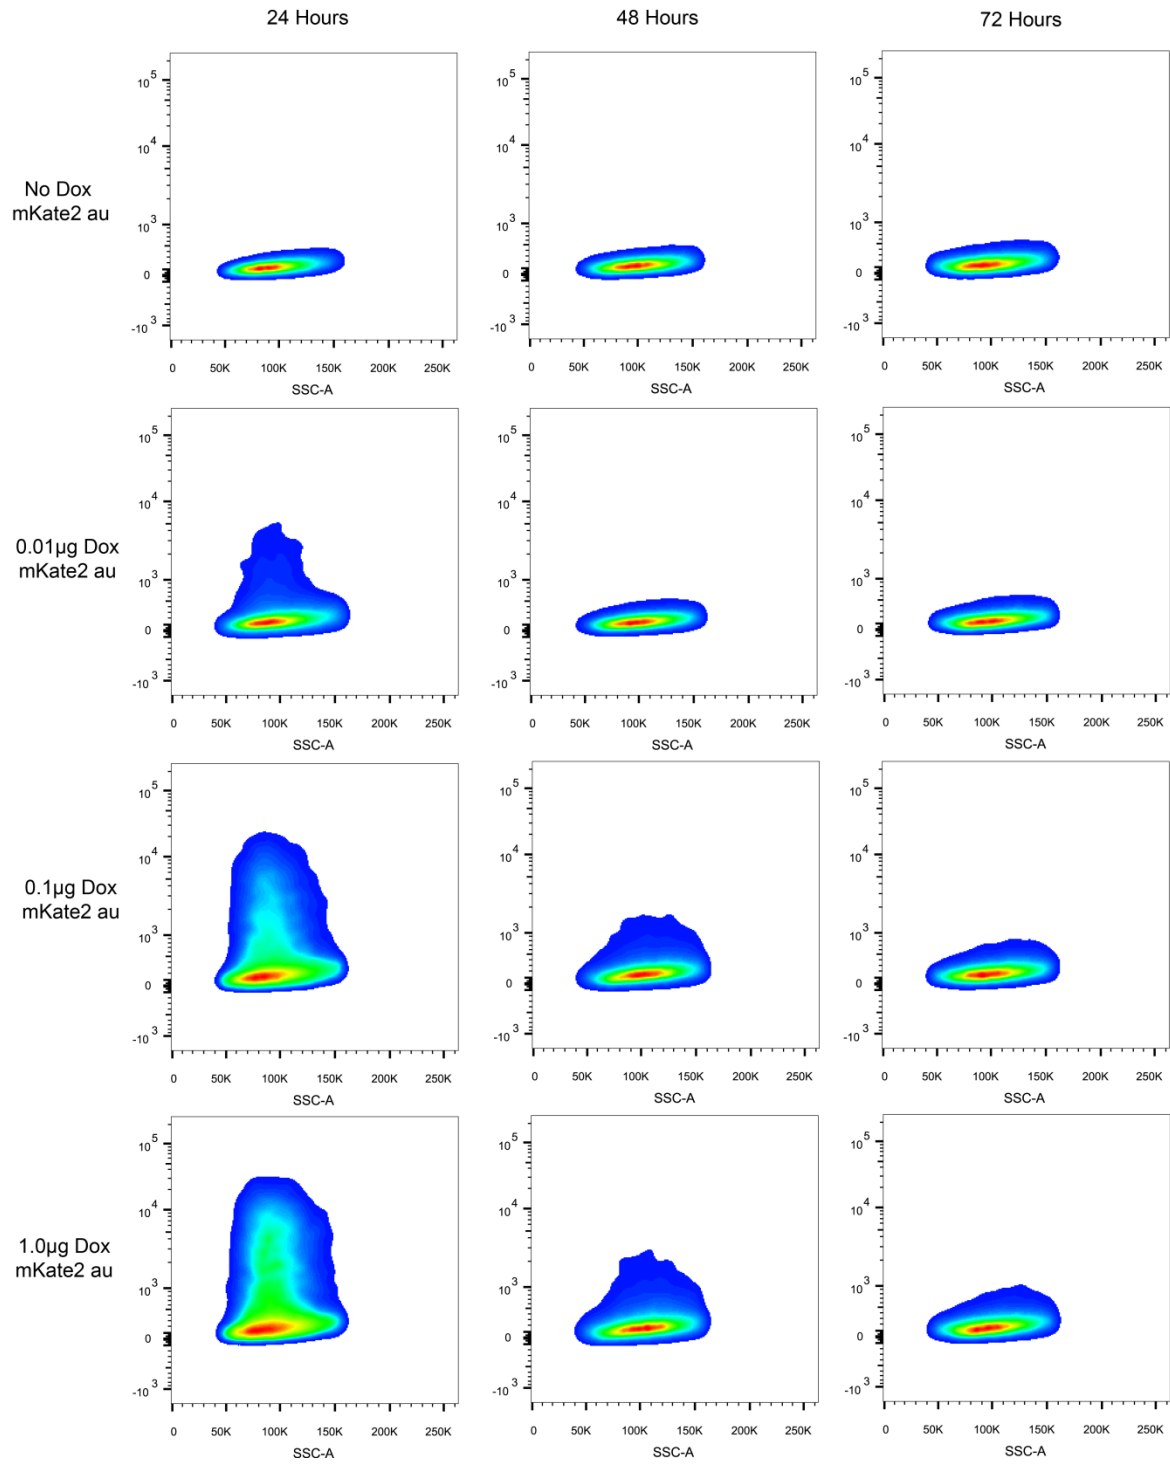

**Supplementary Figure 11:** Representative FACS analysis showing mKate2 au intensity versus SSC for the Dox titrations of no Dox, 0.01µg, 0.01µg, and 1.0µg; construct is ptreCas9-mKate2-T1gRNA.

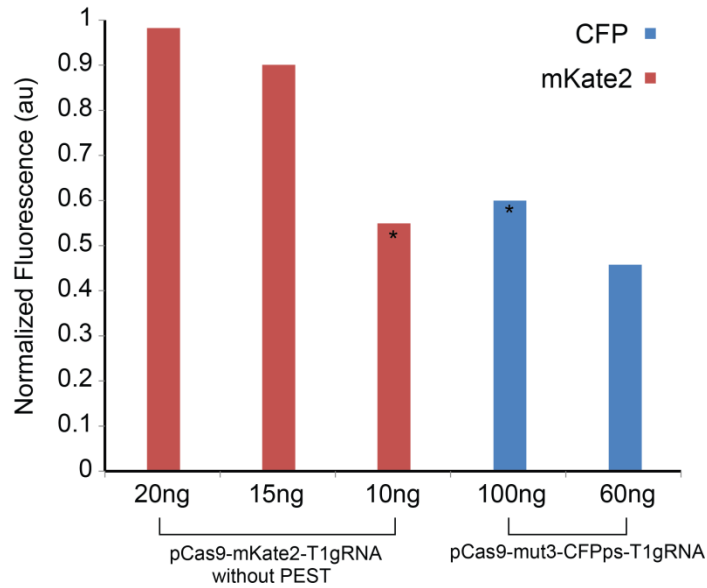

**Supplementary Figure 12:** Normalized reporter expression for the triple mutant (pCas9-mut3-CFPps-T1gRNA, Tag-CFP output) and pCas9-mKate2-T1gRNA (without PEST domain, mKate2 output) measured at 24 hours. We selected the 100ng triple mutant versus 10ng of pCas9-mKate2-T1gRNA , which yield approximately the same fluorescence (indicated with the star).

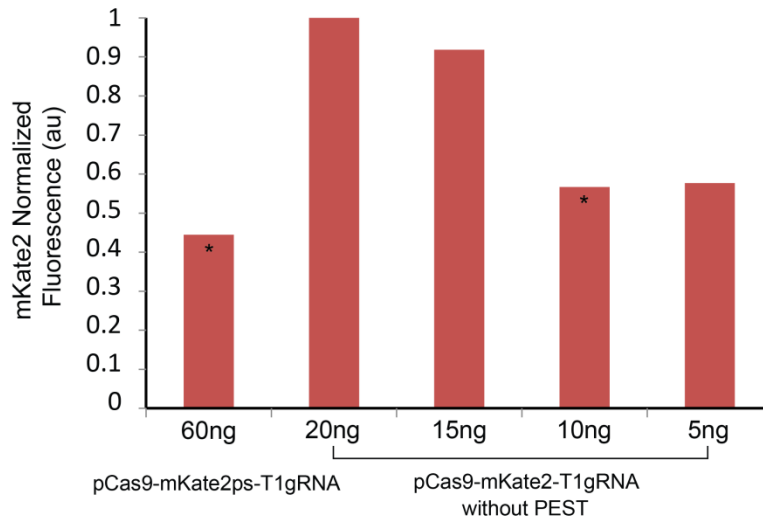

**Supplementary Figure 13:** Normalized reporter expression for pCas9-mKate2ps-T1gRNA plasmid with PEST and pCas9-mKate2-T1gRNA without the PEST domain. We selected the ratio of approximately 6:1.

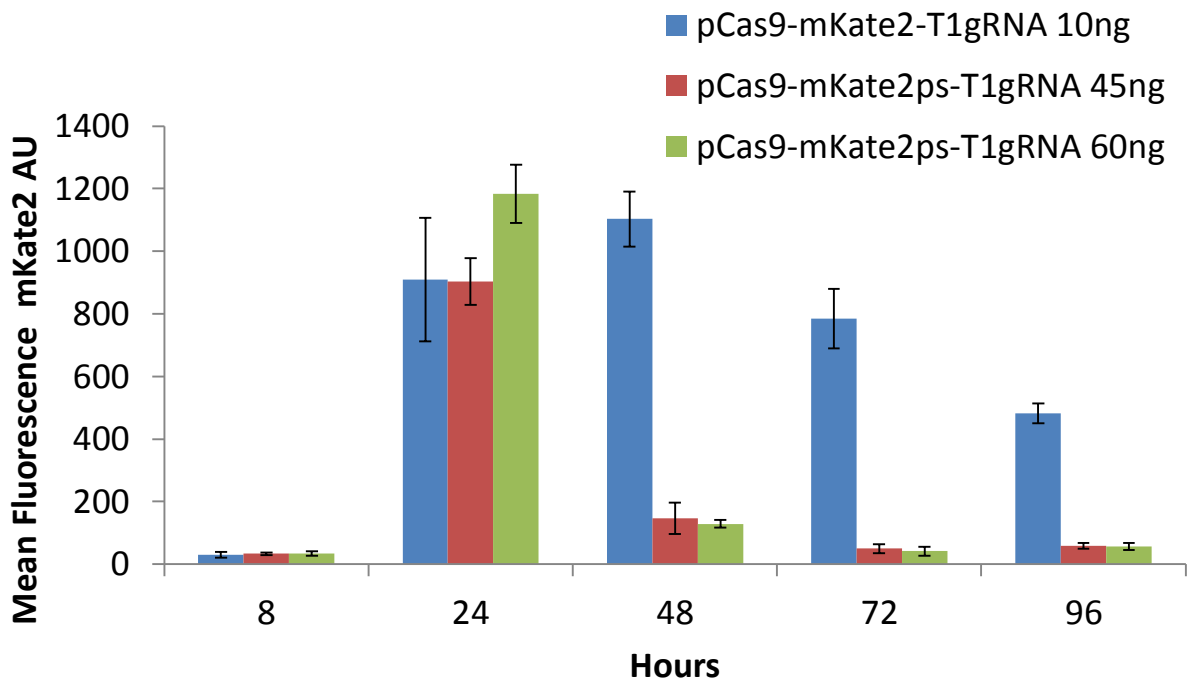

**Supplementary Figure 14:** Mean reporter expression for pCas9-mKate2ps-T1gRNA (45ng and 60ng) and pCas9-mKate2-T1gRNA (10ng) without the PEST domain on mKate2 (biological triplicates shown). Transient transfection masses are shown in legend. Error bars represent standard deviation of the means.

**Supplementary Video 1:** Pulse behavior on a population level for our self-cleaving plasmid (pCas9-mKate2ps-T1gRNA). The first frame represents 5 hours post-transfection and each frame represents a 20 minute interval. Final frame shows 45 hours post-transfection.

**Supplementary Video 2:** mKate2 expression on a population level for our non-targeting plasmid (pCas9-mKate2ps-CgRNA); this control has no targets for the gRNA. The first frame represents 5 hours post-transfection and each frame represents a 20 minute interval. Final frame shows 45 hours post-transfection.”

## Supplementary Tables

**Supplementary Table 1:** List of plasmids

| Identifier                               | Description                                                        | Plasmid                                             |
|------------------------------------------|--------------------------------------------------------------------|-----------------------------------------------------|
| <b>pCas9-mKate2ps-T1gRNA</b>             | Pulse system with T1 gRNA (targeting ORF of mKate2)                | CMV-Cas9-2A-mKate2-PEST--U6-T1gRNA                  |
| <b>pCas9-mKate2ps-T2gRNA</b>             | Pulse system with T2 gRNA (targeting ORF of mKate2)                | CMV-Cas9-2A-mKate2-PEST--U6-T2gRNA                  |
| <b>pCas9-mKate2ps-CgRNA</b>              | Control with gRNA which does not target the plasmid                | CMV-Cas9-2A-mKate2-PEST--U6-CgRNA                   |
| <b>pUbC-CFPps--pCas9-mKate2ps-T1gRNA</b> | Control with additional Tag-CFP reporter (with T1 gRNA)            | UbC-TagCFP-PEST--CMV-Cas9-2A-mKate2-PEST--U6-T1gRNA |
| <b>pUbC-CFPps--pCas9-mKate2ps-CgRNA</b>  | Control with additional Tag-CFP reporter (Non-targeting C gRNA)    | UbC-TagCFP-PEST--CMV-Cas9-2A-mKate2-PEST--U6-CgRNA  |
| <b>pCas9-mKate2-T1gRNA</b>               | Pulse system with T1 gRNA and mKate2 lacking PEST                  | CMV-Cas9-2A-mKate2--U6-T1gRNA                       |
| <b>ptreCas9-mKate2-T1gRNA</b>            | Pulse system driven by the inducible TRE3G (with T1 gRNA)          | TRE3G-Cas9-2A-mKate2-PEST--U6-T1gRNA                |
| <b>pCas9-t1-CFPps-T1gRNA</b>             | Pulse system with CFP reporter preceded by T1 target               | CMV-Cas9-2A-T1tgt(orig)-TagCFP-PEST--U6-T1gRNA      |
| <b>pCas9-mut1-CFPps-T1gRNA</b>           | Pulse system with CFP reporter preceded by single mutant T1 target | CMV-Cas9-2A-T1tgt(1x mut)-TagCFP-PEST--U6-T1gRNA    |
| <b>pCas9-mut3-CFPps-T1gRNA</b>           | Pulse system with CFP reporter preceded by triple mutant T1 target | CMV-Cas9-2A-T1tgt(3x mut)-TagCFP-PEST--U6-T1gRNA    |

**Supplementary Table 2:** Primers

| Identifier | Description                           | Oligo                                            |
|------------|---------------------------------------|--------------------------------------------------|
| P1         | Cas9 Forward with NheI                | GCCACCGCTAGCCTTGCCACCATGGACAAGAAGTACTCC          |
| P2         | Cas9 Reverse 2A Overlap               | AAGACTTCTCTGCCCTCAGCCACCTTCTTCTTCTTGGGGTC<br>AGC |
| P4         | 2A Peptide FWD (for mKate2) no Target | GCTGAGGGCAGAGGAAGTCTTC                           |

|     |                                                                                      |                                                                    |
|-----|--------------------------------------------------------------------------------------|--------------------------------------------------------------------|
| P6  | PEST Reverse with TAA (for mKate2) with NotI (preserves Poly A tail of CFP backbone) | gccaccGCGGCCGCTTAGACGTTGATCCTGGCGCTG                               |
| P7  | mKate2 Forward                                                                       | ACCGAGACCCTGTACCCCGC                                               |
| P8  | mKate2 Reverse                                                                       | CAGGGCCATGTCGGCTCTGC                                               |
| P9  | U6 gRNA seq Forward                                                                  | GGAACCAATTCAGTCGACTGGATC                                           |
| P10 | Non-targeting gRNA Forward                                                           | TTTCTTGGCTTTATATATCTTGTGGAAAGGACGAAACACCGAG<br>GCAAGAGTGCCTTGACG   |
| P11 | Non-targeting gRNA Reverse                                                           | GACTAGCCTTATTTAACTTGCTATTTCTAGCTCTAAAACCGTCA<br>AGGCACTCTTGCCCTC   |
| P12 | Screened Target 1 mKate2 CDS Forward                                                 | TTTCTTGGCTTTATATATCTTGTGGAAAGGACGAAACACCGTGA<br>GAATCAAGGCGGTCTCGA |
| P13 | Screened Target 1 mKate2 CDS Reverse                                                 | GACTAGCCTTATTTAACTTGCTATTTCTAGCTCTAAAACCTCGAC<br>CGCCTTGATTCTCAC   |
| P14 | Screened Target 2 mKate2 CDS Forward                                                 | TTTCTTGGCTTTATATATCTTGTGGAAAGGACGAAACACCGATG<br>AGAATCAAGGCGGTCTCG |
| P15 | Screened Target 2 mKate2 CDS Reverse                                                 | GACTAGCCTTATTTAACTTGCTATTTCTAGCTCTAAAACCGACC<br>GCCTTGATTCTCATC    |
| P16 | gRNA Extract Forward Bsal (Bsal native to Evrogen CFP)                               | GCCACCccaccgagaccTCAGTCGACTGGATCCGGTA                              |
| P17 | gRNA Extract Reverse Bsal                                                            | GCCACCggtctcggtggGATCCACTAGTAACGGCCG                               |
| P23 | Apal mKate2 FWD                                                                      | gccaccGGGCCCATGGTGAGCGAGCTGATTAAGGAGAA                             |
| P24 | FseI mKate2 REV with STOP                                                            | gccaccGGCCGGCCTTATCTGTGCCCCAGTTTGCTAGG                             |
| P25 | CFP PEST No Mutation F (open reading frame #1 from mKate2)                           | gccaccGGGCCCATGAGAATCAAGGCGGTCTGAGGGgATGAGCG<br>GGGGCGAGGAGCTGTTC  |
| P26 | CFP PEST REV                                                                         | gccaccGGCCGGCCTTAGACGTTGATCCTGGCGCTGGC                             |
| P27 | CFP PEST 1 Mutation F (G-T,A-C,C-A,T-G)                                              | gccaccGGGCCCATGAGAATCAAGGCGGTCTGATGGgATGAGCG<br>GGGGCGAGGAGCTGTTC  |



|     |                                                            |                                                                               |
|-----|------------------------------------------------------------|-------------------------------------------------------------------------------|
| P28 | CFP PEST 3 Mutation F (G-T,A-C,C-A,T-G)                    | gccaccGGGCCCATGAGAATCAAGGCTGTAGATGGgATGAGCG<br>GGGGCGAGGAGCTGTTC              |
| P32 | TRE-3G-FWD (truncate left cmv min) with rep origin overlap | TGTGGATAACCGTATTACCGCCCCGTACACGCCACCTCGACATA                                  |
| P33 | TRE-3G-REV with NheI                                       | gccaccGCTAGCCGGAAAGTTGGTATAAGACAAAAGTGTGTGG                                   |
| P34 | Plasmid Rep Origin FWD with SpeI                           | CGGCCGTTACTAGTGGATCCGC                                                        |
| P35 | Plasmid Rep Origin REV                                     | GGCGGTAATACGGTTATCCACAGAATCAGG                                                |
| P36 | CPCR 3G FWD - Anneal 52                                    | TGGAAAGGACGAAACACCGT                                                          |
| P37 | CPCR 3G REV - Product is 473                               | TTTTCTACGGGGTCTGACGC                                                          |
| P38 | Cas9 REV (near beginning)                                  | TTTGCTCGGCACCTTGTACT                                                          |
| P39 | UbC Forward                                                | gccaccACTAGTGGCCTCCGCGCCGGTTTTG                                               |
| P40 | UbC Reverse without SpeI                                   | CTAACTGAAAATTACATATTGACCC                                                     |
| P41 | UbC Reverse                                                | TCGTCTAACAAAAAGCCAAAAACGGCCAGAATTTAGCGGACA<br>ATTTAGTACTCTAACTGAAAATTACATATTG |
| P42 | TagCFP-PEST FWD                                            | CGTTTTTGGCTTTTTTGTAGACGAgccaccATGAGCGGGGGCG<br>AGGAGCT                        |
| P43 | TagCFP-PEST REV                                            | gccaccACTAGTGATGAGTTTGGACAAACCACAAC                                           |

**Supplementary Table 3:** gRNA targets

| gRNA Name                                           | gRNA Sequence         |
|-----------------------------------------------------|-----------------------|
| T1: mKate2 Open Reading Frame                       | ATGAGAATCAAGGCGGTCTGA |
| T2: mKate2 Open Reading Frame                       | CATGAGAATCAAGGCGGTCTG |
| C: Non-targeting; no match in our complete plasmids | TAGGCAAGAGTGCCTTGACG  |

**Supplementary Table 4:** Screened gRNA targets for the mKate2 open reading frame. Only the targets with quality score above 80% are shown.

| #      | gRNA                   | PAM | Score % |
|--------|------------------------|-----|---------|
| 1 (T1) | ATGAGAATCAAGGCGGTCTCGA | GGG | 91      |
| 2 (T2) | CATGAGAATCAAGGCGGTCTCG | AGG | 90      |
| 3      | GGCGAAGGCAAGCCCTACGA   | GGG | 88      |
| 4      | AAGTGCACATCCGAGGGCGA   | AGG | 88      |
| 5      | CACTTCAAGTGCACATCCGA   | GGG | 83      |
| 6      | AGAATCAAGGCGGTCTGAGGG  | CGG | 83      |
| 7      | ATGGTCTGGGTGCCCTCGTA   | GGG | 82      |
| 8      | GGGCGAAGGCAAGCCCTACG   | AGG | 82      |
| 9      | GTAGGGCTTGCCTTCGCCCT   | CGG | 82      |
| 10     | CCACTTCAAGTGCACATCCG   | AGG | 80      |

**Supplementary Table 5:** Model ODEs

|                                                          |
|----------------------------------------------------------|
| [Pulse Plasmid] -> mRNACas9_2A_mKate2 + [Pulse Plasmid]  |
| mRNACas9_2A_mKate2 -> null                               |
| mRNACas9_2A_mKate2 -> mRNACas9_2A_mKate2 + Cas9          |
| Cas9->null                                               |
| mRNACas9_2A_mKate2 -> mRNACas9_2A_mKate2 + mKate2        |
| mKate2->null                                             |
| [Pulse Plasmid] -> gRNA + [Pulse Plasmid]                |
| gRNA ->null                                              |
| Cas9+gRNA->Cas9-gRNA                                     |
| Cas9-gRNA->null                                          |
| [Pulse Plasmid] + Cas9-gRNA -> [Pulse Plasmid-Cas9-gRNA] |
| [Pulse Plasmid-Cas9-gRNA] ->null                         |

**Supplementary Table 6: Simulation Parameters**

| Parameter (1)               | Value (1/s)             |
|-----------------------------|-------------------------|
| k_mRNA_Cas9_2A_mKate2       | 0.08227                 |
| k_mRNA_Cas9_mKate2_deg      | 0.004214                |
| k_gRNA                      | 0.00004214              |
| k_gRNA_deg                  | $0.42 \times 10^{-5}$   |
| k_pr_Cas9                   | $7.5916 \times 10^{-6}$ |
| k_pr_Cas9_deg               | $9.20 \times 10^{-7}$   |
| k_pr_mKate2                 | $7.30 \times 10^{-5}$   |
| k_pr_mKate2_deg             | $1.82 \times 10^{-5}$   |
| k_Cas9_gRNA_Complex         | $1.00 \times 10^{-6}$   |
| k_Cas9_gRNA_Complex_deg     | $0.42 \times 10^{-3}$   |
| k_Cas9_gRNA_Plasmid_cutting | $1.00 \times 10^{-3}$   |

## Supplementary Cloning Information

**Plasmid:** pCas9-mKate2ps-T1gRNA (CMV-Cas9-2A-mKate2-PEST--U6-T1gRNA)

Guide RNA were constructed according to option B of the gRNA synthesis protocol from Mali et al(2). T1 gRNA used oligos P12 and P13, T2 gRNA used oligos P14 and P15 and the non-targeting gRNA used oligos P10 and P11. The gRNAs were sequenced using primer P9. Each gRNA construct was amplified along with its U6 promoter using primers P16 and P17 and cloned into Tag-CFP-N (Evrogen) using BsaI. To accomplish this BsaI cloning, each U6-gRNA amplicon was PCR purified and then digested with BsaI at 37°C; the digested products were gel purified. Tag-CFP-N was digested with BsaI at 37°C, CIP treated and then gel purified. Each gRNA was ligated with the Tag-CFP-N backbone at a 1:3 ratio using T4 ligase at 4°C overnight and then transformed into NEB-5-alpha high efficiency cells. The transformations were plated on Kanamycin plates and colonies were screened by test digestion with BsaI. These three vectors containing each U6-gRNA were subsequently used as a backbone for Cas9-2A-mKate2-PEST described in the following steps. To create Cas9-2A-mKate2-PEST, Cas9 was amplified from hCas9 (Addgene) using primers P1 and P2 and gel purified. Next, 2A-mKate2-PEST was amplified using primers P4 and P6 and gel purified. Both Cas9 and 2A-mKate2-PEST amplicons were combined using overlap extension PCR with primers P1 and P6. The completed amplicon from the overlap extension was then digested with NheI and NotI at 37°C and gel purified. Each U6-gRNA-CMV-Tag-CFP backbone (T1, T2 and C non-targeting) was digested with NheI and NotI at 37°C gel purified. Next, the digested U6-gRNA backbones were ligated with the digested Cas9-2A-mKate2-PEST at a 1:1 ratio with T4 ligase overnight at 4°C along with a negative reaction containing only the backbone. The

following day, the ligations were transformed into XL10-Ultracompetent cells and spread on Kanamycin plates. Colonies were inoculated and screened by transfection. Sequencing was performed with primers P7 and P8.

**Plasmid:** pCas9-mKate2-T1gRNA (pCas9-mKate2-T1gRNA)

U6-gRNAT1—CMV-Cas9-2A-mKate2-PEST was digested with ApaI at 25°C for one hour and subsequently with FseI at 37°C for one hour to remove mKate2-PEST and then gel purified. Next, mKate2 was amplified without PEST using primers P23 and P24 and digested with ApaI at 25°C for one hour subsequently with FseI at 37°C for one hour; the digestion was followed by gel purification. The two gel purified products were ligated 1:3 with T4 ligase overnight at 4°C and transformed the following day in XL10-Ultracompetent cells. Sequencing was performed with primer P19 and verified by transfection.

**Plasmid:** pCas9-t1-CFPps-T1gRNA (CMV-Cas9-2A-T1tgt(orig)-TagCFP-PEST--U6-T1gRNA)

U6-gRNAT1\_CMV-Cas9-2A-mKate2-PEST was digested with ApaI at 25°C for one hour and subsequently with FseI at 37°C for one hour to remove mKate2-PEST and then gel purified. Target T1 was added to the Tag-CFP-PEST sequence using primers P25 and P26. Single mutant target T1 was added to the Tag-CFP-PEST sequence using primers P27 and P26. Triple mutant target T1 was added to the Tag-CFP-PEST sequence using primers P28 and P26. Each of the three amplicons of Tag-CFP-PEST preceded by targets was digested with ApaI at 25°C for one hour and subsequently with FseI at 37°C for one hour; all three digestions were gel purified. Each Target-Tag-CFP-PEST was ligated with gel purified U6-gRNA-T1-CMV-Cas9-2A with T4 ligase overnight at 4°C and transformed the following day in XL10-Ultracompetent cells.

**Plasmid:** ptreCas9-mKate2-T1gRNA (TRE3G-Cas9-2A-mKate2-PEST--U6-T1gRNA)

The replication origin from U6-gRNAT1—CMV-Cas9-2A-mKate2-PEST was amplified using 34 and 35 while the TRE3G promoter was amplified using primers P32 and P33. The two amplicons were gel purified and then an overlap PCR was performed with primers P34 and P33. This product was digested with SpeI and NheI and then gel purified. U6-gRNAT1—CMV-Cas9-2A-mKate2-PEST was digested with SpeI and NheI, CIP treated, and then gel purified. The two gel purified digestions were joined with T4 ligase and transformed in XL10-Ultracompetent cells. The clones were screened for the correct orientation using primers P36 and P37 and then sequenced with primer P38. Subsequently, the construct was tested by transfection.

**Plasmid:** pUbC-CFPps--pCas9-mKate2ps-T1gRNA (UbC-TagCFP-PEST--CMV-Cas9-2A-mKate2-PEST--U6-T1gRNA)

The UbC promoter was amplified from UbC-mKate2-PEST (unpublished work) using primers P39 and P40. This amplicon was re-amplified with P39 and P41. Next, we amplified TagCFP-PEST from U6-gRNAT1\_CMV-TargetT1-Cas9-2A-TagCFP-PEST using primers P42 and P43. Next, we performed overlap PCR of UbC and TagCFP-PEST using oligos P39 and P43 to generate the amplicon UbC-TagCFP-PEST. We digested this overlap PCR product with SpeI and digested the backbone U6-gRNAT1\_CMV-Cas9-2A-mKate2-PEST with SpeI. After CIP treating the backbone, we ligated the digested products and screen for appropriate orientation using test digestion to yield UbC-TagCFP-PEST-U6-gRNAT1\_CMV-Cas9-2A-mKate2-PEST.

## References

1. Bleris,L., Xie,Z., Glass,D., Adadey,A., Sontag,E. and Benenson,Y. (2011) Synthetic incoherent feedforward circuits show adaptation to the amount of their genetic template. *Molecular Systems Biology*, **7**, .
2. Mali,P., Yang,L., Esvelt,K.M., Aach,J., Guell,M., DiCarlo,J.E., Norville,J.E. and Church,G.M. (2013) RNA-guided human genome engineering via Cas9. *Science*, **339**, 823-826.
